# Supplementary material for: The Origin of Large Molecules in Primordial Autocatalytic Reaction Networks
Source: PLOS journal article supplement (doi:10.1371/journal.pone.0029546), 2012-01-04
Supplement: S4 (10.1371/journal.pone.0029546.s004) [file journal.pone.0029546.s004]

**Supporting Information: Table S3****List of reactions and their catalysts in ACS(36,28) (referred in Fig. 14 of main text)**

The table lists all the reactions with their respective catalysts in the example of a catalyzed chemistry, quoted in the main text, containing a cascade of nested ACSs for  $f = 2$  generated using Algorithm 4. The steady state concentrations for this chemistry are displayed in Fig. 14. This chemistry was generated with  $g = 7$  and  $n_k = 3$ .

The molecules in various generations are as follows:  $P_0 = \{(1, 0), (0, 1)\}$ ,  $P_1 = \{(1, 1), (0, 2), (2, 0)\}$ ,  $P_2 = \{(1, 3), (2, 2), (3, 0)\}$ ,  $P_3 = \{(2, 6), (2, 3), (5, 2)\}$ ,  $P_4 = \{(4, 6), (7, 4), (7, 8)\}$ ,  $P_5 = \{(8, 12), (6, 12), (14, 8)\}$ ,  $P_6 = \{(14, 24), (22, 20), (11, 12)\}$ ,  $P_7 = \{(29, 28), (36, 28), (24, 26)\}$ .

The catalyst for a reaction listed under generation  $P_k$  is added at step  $k$  of algorithm. It is apparent from the reaction table that the ACSs are maximally overlapping, *i.e.*, any ACS of generation  $k$  contains all the reactions of generation  $k - 1$ .

| Reaction                                       | Catalyst added in generation |        |        |        |         |          |          |
|------------------------------------------------|------------------------------|--------|--------|--------|---------|----------|----------|
|                                                | $P_1$                        | $P_2$  | $P_3$  | $P_4$  | $P_5$   | $P_6$    | $P_7$    |
| $(0, 1) + (0, 1) \rightleftharpoons (0, 2)$    | (1, 1)                       | (1, 3) | (2, 3) | (7, 4) | (8, 12) | (11, 12) | (29, 28) |
| $(0, 1) + (1, 0) \rightleftharpoons (1, 1)$    | (0, 2)                       | (1, 3) | (2, 6) | (4, 6) | (14, 8) | (22, 20) | (36, 28) |
| $(1, 0) + (1, 0) \rightleftharpoons (2, 0)$    | (1, 1)                       | (3, 0) | (5, 2) | (7, 4) | (14, 8) | (14, 24) | (29, 28) |
| $(1, 0) + (2, 0) \rightleftharpoons (3, 0)$    |                              | (2, 2) | (5, 2) | (4, 6) | (14, 8) | (14, 24) | (24, 26) |
| $(1, 1) + (0, 2) \rightleftharpoons (1, 3)$    |                              | (1, 3) | (2, 6) | (7, 8) | (8, 12) | (14, 24) | (24, 26) |
| $(0, 2) + (2, 0) \rightleftharpoons (2, 2)$    |                              | (1, 3) | (2, 6) | (7, 8) | (6, 12) | (22, 20) | (29, 28) |
| $(0, 1) + (2, 2) \rightleftharpoons (2, 3)$    |                              |        | (2, 6) | (7, 4) | (14, 8) | (22, 20) | (24, 26) |
| $(3, 0) + (2, 2) \rightleftharpoons (5, 2)$    |                              |        | (2, 3) | (7, 8) | (6, 12) | (11, 12) | (29, 28) |
| $(1, 3) + (1, 3) \rightleftharpoons (2, 6)$    |                              |        | (5, 2) | (7, 8) | (14, 8) | (22, 20) | (24, 26) |
| $(2, 0) + (2, 6) \rightleftharpoons (4, 6)$    |                              |        |        | (4, 6) | (14, 8) | (22, 20) | (36, 28) |
| $(2, 2) + (5, 2) \rightleftharpoons (7, 4)$    |                              |        |        | (7, 4) | (6, 12) | (14, 24) | (36, 28) |
| $(5, 2) + (2, 6) \rightleftharpoons (7, 8)$    |                              |        |        | (7, 4) | (14, 8) | (14, 24) | (36, 28) |
| $(2, 6) + (4, 6) \rightleftharpoons (6, 12)$   |                              |        |        |        | (14, 8) | (11, 12) | (29, 28) |
| $(4, 6) + (4, 6) \rightleftharpoons (8, 12)$   |                              |        |        |        | (14, 8) | (22, 20) | (36, 28) |
| $(7, 4) + (7, 4) \rightleftharpoons (14, 8)$   |                              |        |        |        | (8, 12) | (11, 12) | (36, 28) |
| $(3, 0) + (8, 12) \rightleftharpoons (11, 12)$ |                              |        |        |        |         | (22, 20) | (36, 28) |

*continued on next page ...*

...continued from previous page

| Reaction                                         | Catalyst in generation |       |       |       |       |            |            |
|--------------------------------------------------|------------------------|-------|-------|-------|-------|------------|------------|
|                                                  | $P_1$                  | $P_2$ | $P_3$ | $P_4$ | $P_5$ | $P_6$      | $P_7$      |
| $(8, 12) + (6, 12) \rightleftharpoons (14, 24)$  |                        |       |       |       |       | $(22, 20)$ | $(24, 26)$ |
| $(14, 8) + (8, 12) \rightleftharpoons (22, 20)$  |                        |       |       |       |       | $(11, 12)$ | $(29, 28)$ |
| $(2, 6) + (22, 20) \rightleftharpoons (24, 26)$  |                        |       |       |       |       |            | $(29, 28)$ |
| $(7, 8) + (22, 20) \rightleftharpoons (29, 28)$  |                        |       |       |       |       |            | $(29, 28)$ |
| $(14, 8) + (22, 20) \rightleftharpoons (36, 28)$ |                        |       |       |       |       |            | $(29, 28)$ |
