# Supplementary material for: The Origin of Large Molecules in Primordial Autocatalytic Reaction Networks
Source: PLOS journal article supplement (doi:10.1371/journal.pone.0029546), 2012-01-04
Supplement: S5 (10.1371/journal.pone.0029546.s005) [file journal.pone.0029546.s005]

**Supporting Information: Table S4****List of reactions and their catalysts in ACS(18,27) (referred in Fig. 15 of main text)**

The table lists all the reactions with their respective catalysts and catalytic strengths in the example of a catalyzed chemistry, quoted in the main text, containing a cascade of partially overlapping ACSs for  $f = 2$  generated using Algorithm 5. The steady state concentrations for this chemistry are displayed in Fig. 15.

The catalyzed chemistry contains 10 generations of ACSs of lengths 3, 6, 10, 15, 19, 25, 30, 35, 40, and 45.

TABLE S4a: **List of reactions in the ACSs of different length and their catalysts.** ACSs of increasing length (using Algorithm 5) are added in the chemistry. The length of the ACS and the catalytic strength of the catalyst are mentioned in the table.

| Reaction                                                      | Catalyst |
|---------------------------------------------------------------|----------|
| <b>Generation 1 of length 3 (<math>\kappa = 1000</math>)</b>  |          |
| $(1, 0) + (1, 0) \rightleftharpoons (2, 0)$                   | $(3, 0)$ |
| $(2, 0) + (1, 0) \rightleftharpoons (3, 0)$                   | $(3, 0)$ |
| <b>Generation 2 of length 6 (<math>\kappa = 2000</math>)</b>  |          |
| $(1, 0) + (1, 0) \rightleftharpoons (2, 0)$                   | $(4, 2)$ |
| $(0, 1) + (2, 0) \rightleftharpoons (2, 1)$                   | $(4, 2)$ |
| $(2, 1) + (0, 1) \rightleftharpoons (2, 2)$                   | $(4, 2)$ |
| $(2, 1) + (2, 1) \rightleftharpoons (4, 2)$                   | $(4, 2)$ |
| <b>Generation 3 of length 10 (<math>\kappa = 4000</math>)</b> |          |
| $(1, 0) + (0, 1) \rightleftharpoons (1, 1)$                   | $(4, 6)$ |
| $(1, 1) + (1, 0) \rightleftharpoons (2, 1)$                   | $(4, 6)$ |
| $(1, 1) + (1, 1) \rightleftharpoons (2, 2)$                   | $(4, 6)$ |
| $(0, 1) + (2, 2) \rightleftharpoons (2, 3)$                   | $(4, 6)$ |
| $(2, 3) + (2, 3) \rightleftharpoons (4, 6)$                   | $(4, 6)$ |
| <b>Generation 4 of length 15 (<math>\kappa = 7000</math>)</b> |          |
| $(0, 1) + (0, 1) \rightleftharpoons (0, 2)$                   | $(7, 8)$ |
| $(0, 2) + (1, 0) \rightleftharpoons (1, 2)$                   | $(7, 8)$ |
| $(1, 2) + (1, 0) \rightleftharpoons (2, 2)$                   | $(7, 8)$ |
| $(2, 2) + (2, 2) \rightleftharpoons (4, 4)$                   | $(7, 8)$ |

*continued on next page ...*

TABLE S4a

... continued from previous page

| Reaction                                                       | Catalyst   |
|----------------------------------------------------------------|------------|
| $(1, 2) + (4, 4) \rightleftharpoons (5, 6)$                    | $(7, 8)$   |
| $(5, 6) + (1, 2) \rightleftharpoons (6, 8)$                    | $(7, 8)$   |
| $(5, 6) + (2, 2) \rightleftharpoons (7, 8)$                    | $(7, 8)$   |
| <b>Generation 5 of length 19 (<math>\kappa = 10000</math>)</b> |            |
| $(0, 1) + (1, 0) \rightleftharpoons (1, 1)$                    | $(7, 12)$  |
| $(1, 1) + (0, 1) \rightleftharpoons (1, 2)$                    | $(7, 12)$  |
| $(1, 2) + (1, 2) \rightleftharpoons (2, 4)$                    | $(7, 12)$  |
| $(1, 1) + (2, 4) \rightleftharpoons (3, 5)$                    | $(7, 12)$  |
| $(2, 4) + (3, 5) \rightleftharpoons (5, 9)$                    | $(7, 12)$  |
| $(1, 1) + (5, 9) \rightleftharpoons (6, 10)$                   | $(7, 12)$  |
| $(1, 2) + (6, 10) \rightleftharpoons (7, 12)$                  | $(7, 12)$  |
| <b>Generation 6 of length 25 (<math>\kappa = 15000</math>)</b> |            |
| $(0, 1) + (1, 0) \rightleftharpoons (1, 1)$                    | $(12, 13)$ |
| $(1, 1) + (1, 0) \rightleftharpoons (2, 1)$                    | $(12, 13)$ |
| $(2, 1) + (0, 1) \rightleftharpoons (2, 2)$                    | $(12, 13)$ |
| $(2, 2) + (0, 1) \rightleftharpoons (2, 3)$                    | $(12, 13)$ |
| $(1, 0) + (2, 3) \rightleftharpoons (3, 3)$                    | $(12, 13)$ |
| $(2, 1) + (3, 3) \rightleftharpoons (5, 4)$                    | $(12, 13)$ |
| $(2, 3) + (5, 4) \rightleftharpoons (7, 7)$                    | $(12, 13)$ |
| $(7, 7) + (2, 2) \rightleftharpoons (9, 9)$                    | $(12, 13)$ |
| $(7, 7) + (3, 3) \rightleftharpoons (10, 10)$                  | $(12, 13)$ |
| $(9, 9) + (2, 3) \rightleftharpoons (11, 12)$                  | $(12, 13)$ |
| $(11, 12) + (1, 1) \rightleftharpoons (12, 13)$                | $(12, 13)$ |
| <b>Generation 7 of length 30 (<math>\kappa = 20000</math>)</b> |            |
| $(0, 1) + (1, 0) \rightleftharpoons (1, 1)$                    | $(13, 17)$ |
| $(1, 1) + (0, 1) \rightleftharpoons (1, 2)$                    | $(13, 17)$ |
| $(1, 2) + (1, 1) \rightleftharpoons (2, 3)$                    | $(13, 17)$ |
| $(1, 0) + (2, 3) \rightleftharpoons (3, 3)$                    | $(13, 17)$ |
| $(3, 3) + (1, 1) \rightleftharpoons (4, 4)$                    | $(13, 17)$ |
| $(3, 3) + (1, 2) \rightleftharpoons (4, 5)$                    | $(13, 17)$ |
| $(2, 3) + (4, 5) \rightleftharpoons (6, 8)$                    | $(13, 17)$ |
| $(2, 3) + (6, 8) \rightleftharpoons (8, 11)$                   | $(13, 17)$ |
| $(6, 8) + (4, 4) \rightleftharpoons (10, 12)$                  | $(13, 17)$ |
| $(10, 12) + (2, 3) \rightleftharpoons (12, 15)$                | $(13, 17)$ |
| $(12, 15) + (1, 2) \rightleftharpoons (13, 17)$                | $(13, 17)$ |
| <b>Generation 8 of length 35 (<math>\kappa = 27000</math>)</b> |            |

continued on next page ...

TABLE S4a

... continued from previous page

| Reaction                                                        | Catalyst |
|-----------------------------------------------------------------|----------|
| $(1, 0) + (0, 1) \rightleftharpoons (1, 1)$                     | (15, 20) |
| $(0, 1) + (1, 1) \rightleftharpoons (1, 2)$                     | (15, 20) |
| $(1, 1) + (1, 2) \rightleftharpoons (2, 3)$                     | (15, 20) |
| $(1, 2) + (2, 3) \rightleftharpoons (3, 5)$                     | (15, 20) |
| $(3, 5) + (1, 1) \rightleftharpoons (4, 6)$                     | (15, 20) |
| $(1, 1) + (4, 6) \rightleftharpoons (5, 7)$                     | (15, 20) |
| $(3, 5) + (4, 6) \rightleftharpoons (7, 11)$                    | (15, 20) |
| $(7, 11) + (4, 6) \rightleftharpoons (11, 17)$                  | (15, 20) |
| $(1, 0) + (11, 17) \rightleftharpoons (12, 17)$                 | (15, 20) |
| $(1, 1) + (12, 17) \rightleftharpoons (13, 18)$                 | (15, 20) |
| $(13, 18) + (1, 2) \rightleftharpoons (14, 20)$                 | (15, 20) |
| $(1, 0) + (14, 20) \rightleftharpoons (15, 20)$                 | (15, 20) |
| <b>Generation 9 of length 40 (<math>\kappa = 35000</math>)</b>  |          |
| $(0, 1) + (0, 1) \rightleftharpoons (0, 2)$                     | (14, 26) |
| $(1, 0) + (0, 2) \rightleftharpoons (1, 2)$                     | (14, 26) |
| $(1, 2) + (1, 2) \rightleftharpoons (2, 4)$                     | (14, 26) |
| $(1, 2) + (2, 4) \rightleftharpoons (3, 6)$                     | (14, 26) |
| $(3, 6) + (1, 0) \rightleftharpoons (4, 6)$                     | (14, 26) |
| $(3, 6) + (2, 4) \rightleftharpoons (5, 10)$                    | (14, 26) |
| $(5, 10) + (1, 2) \rightleftharpoons (6, 12)$                   | (14, 26) |
| $(6, 12) + (2, 4) \rightleftharpoons (8, 16)$                   | (14, 26) |
| $(2, 4) + (8, 16) \rightleftharpoons (10, 20)$                  | (14, 26) |
| $(0, 1) + (10, 20) \rightleftharpoons (10, 21)$                 | (14, 26) |
| $(10, 21) + (0, 2) \rightleftharpoons (10, 23)$                 | (14, 26) |
| $(0, 2) + (10, 23) \rightleftharpoons (10, 25)$                 | (14, 26) |
| $(10, 23) + (1, 2) \rightleftharpoons (11, 25)$                 | (14, 26) |
| $(8, 16) + (5, 10) \rightleftharpoons (13, 26)$                 | (14, 26) |
| $(4, 6) + (10, 20) \rightleftharpoons (14, 26)$                 | (14, 26) |
| <b>Generation 10 of length 45 (<math>\kappa = 50000</math>)</b> |          |
| $(0, 1) + (1, 0) \rightleftharpoons (1, 1)$                     | (18, 27) |
| $(0, 1) + (1, 1) \rightleftharpoons (1, 2)$                     | (18, 27) |
| $(1, 2) + (1, 0) \rightleftharpoons (2, 2)$                     | (18, 27) |
| $(1, 2) + (1, 1) \rightleftharpoons (2, 3)$                     | (18, 27) |
| $(1, 2) + (2, 2) \rightleftharpoons (3, 4)$                     | (18, 27) |
| $(2, 3) + (2, 3) \rightleftharpoons (4, 6)$                     | (18, 27) |
| $(4, 6) + (1, 1) \rightleftharpoons (5, 7)$                     | (18, 27) |

continued on next page ...

TABLE S4a

... continued from previous page

| Reaction                                        | Catalyst |
|-------------------------------------------------|----------|
| $(4, 6) + (3, 4) \rightleftharpoons (7, 10)$    | (18, 27) |
| $(7, 10) + (7, 10) \rightleftharpoons (14, 20)$ | (18, 27) |
| $(0, 1) + (14, 20) \rightleftharpoons (14, 21)$ | (18, 27) |
| $(14, 21) + (2, 2) \rightleftharpoons (16, 23)$ | (18, 27) |
| $(2, 3) + (16, 23) \rightleftharpoons (18, 26)$ | (18, 27) |
| $(14, 21) + (4, 6) \rightleftharpoons (18, 27)$ | (18, 27) |

TABLE S4b: **List of reactions in the catalyzed chemistry and their catalysts.** The table lists all the reactions that are part of the catalyzed chemistry with all its catalysts. The catalysts that belong to different generations ( $G_1$  to  $G_{10}$ ) have been separated in different columns. It is easy to see from this table the amount of overlap between any two nested ACSs. For example, between the ACSs  $G_5$  and  $G_6$  which contain, respectively, 7 and 11 reactions, only one is common.

| Reaction                                    | Catalyst |       |       |       |        |         |         |         |         |          |
|---------------------------------------------|----------|-------|-------|-------|--------|---------|---------|---------|---------|----------|
|                                             | $G_1$    | $G_2$ | $G_3$ | $G_4$ | $G_5$  | $G_6$   | $G_7$   | $G_8$   | $G_9$   | $G_{10}$ |
| $(0, 1) + (0, 1) \rightleftharpoons (0, 2)$ |          |       |       | (7,8) |        |         |         |         | (14,26) |          |
| $(1, 0) + (0, 1) \rightleftharpoons (1, 1)$ |          |       | (4,6) |       | (7,12) | (12,13) | (13,17) | (15,20) |         | (18,27)  |
| $(1, 0) + (1, 0) \rightleftharpoons (2, 0)$ | (3,0)    | (4,2) |       |       |        |         |         |         |         |          |
| $(0, 2) + (1, 0) \rightleftharpoons (1, 2)$ |          |       |       | (7,8) |        |         |         |         | (14,26) |          |
| $(1, 1) + (0, 1) \rightleftharpoons (1, 2)$ |          |       |       |       | (7,12) |         | (13,17) | (15,20) |         | (18,27)  |
| $(0, 1) + (2, 0) \rightleftharpoons (2, 1)$ |          | (4,2) |       |       |        |         |         |         |         |          |
| $(1, 1) + (1, 0) \rightleftharpoons (2, 1)$ |          |       | (4,6) |       |        | (12,13) |         |         |         |          |
| $(2, 0) + (1, 0) \rightleftharpoons (3, 0)$ | (3,0)    |       |       |       |        |         |         |         |         |          |
| $(2, 1) + (0, 1) \rightleftharpoons (2, 2)$ |          | (4,2) |       |       |        | (12,13) |         |         |         |          |
| $(1, 1) + (1, 1) \rightleftharpoons (2, 2)$ |          |       | (4,6) |       |        |         |         |         |         |          |
| $(1, 2) + (1, 0) \rightleftharpoons (2, 2)$ |          |       |       | (7,8) |        |         |         |         |         | (18,27)  |
| $(0, 1) + (2, 2) \rightleftharpoons (2, 3)$ |          |       | (4,6) |       |        | (12,13) |         |         |         |          |
| $(1, 2) + (1, 1) \rightleftharpoons (2, 3)$ |          |       |       |       |        |         | (13,17) | (15,20) |         | (18,27)  |
| $(1, 2) + (1, 2) \rightleftharpoons (2, 4)$ |          |       |       |       | (7,12) |         |         |         | (14,26) |          |
| $(1, 0) + (2, 3) \rightleftharpoons (3, 3)$ |          |       |       |       |        | (12,13) | (13,17) |         |         |          |
| $(2, 1) + (2, 1) \rightleftharpoons (4, 2)$ |          | (4,2) |       |       |        |         |         |         |         |          |
| $(1, 2) + (2, 2) \rightleftharpoons (3, 4)$ |          |       |       |       |        |         |         |         |         | (18,27)  |
| $(1, 1) + (2, 4) \rightleftharpoons (3, 5)$ |          |       |       |       | (7,12) |         |         |         |         |          |
| $(1, 2) + (2, 3) \rightleftharpoons (3, 5)$ |          |       |       |       |        |         |         | (15,20) |         |          |
| $(2, 2) + (2, 2) \rightleftharpoons (4, 4)$ |          |       |       | (7,8) |        |         |         |         |         |          |

continued on next page ...

TABLE S4b

... continued from previous page

| Reaction                                        | Catalyst |       |       |       |        |         |         |         |         |          |
|-------------------------------------------------|----------|-------|-------|-------|--------|---------|---------|---------|---------|----------|
|                                                 | $G_1$    | $G_2$ | $G_3$ | $G_4$ | $G_5$  | $G_6$   | $G_7$   | $G_8$   | $G_9$   | $G_{10}$ |
| $(3, 3) + (1, 1) \rightleftharpoons (4, 4)$     |          |       |       |       |        |         | (13,17) |         |         |          |
| $(1, 2) + (2, 4) \rightleftharpoons (3, 6)$     |          |       |       |       |        |         |         |         | (14,26) |          |
| $(3, 3) + (1, 2) \rightleftharpoons (4, 5)$     |          |       |       |       |        |         | (13,17) |         |         |          |
| $(2, 1) + (3, 3) \rightleftharpoons (5, 4)$     |          |       |       |       |        | (12,13) |         |         |         |          |
| $(2, 3) + (2, 3) \rightleftharpoons (4, 6)$     |          |       | (4,6) |       |        |         |         |         |         | (18,27)  |
| $(3, 5) + (1, 1) \rightleftharpoons (4, 6)$     |          |       |       |       |        |         |         | (15,20) |         |          |
| $(3, 6) + (1, 0) \rightleftharpoons (4, 6)$     |          |       |       |       |        |         |         |         | (14,26) |          |
| $(1, 2) + (4, 4) \rightleftharpoons (5, 6)$     |          |       |       | (7,8) |        |         |         |         |         |          |
| $(1, 1) + (4, 6) \rightleftharpoons (5, 7)$     |          |       |       |       |        |         |         | (15,20) |         | (18,27)  |
| $(2, 4) + (3, 5) \rightleftharpoons (5, 9)$     |          |       |       |       | (7,12) |         |         |         |         |          |
| $(5, 6) + (1, 2) \rightleftharpoons (6, 8)$     |          |       |       | (7,8) |        |         |         |         |         |          |
| $(2, 3) + (4, 5) \rightleftharpoons (6, 8)$     |          |       |       |       |        |         | (13,17) |         |         |          |
| $(2, 3) + (5, 4) \rightleftharpoons (7, 7)$     |          |       |       |       |        | (12,13) |         |         |         |          |
| $(3, 6) + (2, 4) \rightleftharpoons (5, 10)$    |          |       |       |       |        |         |         |         | (14,26) |          |
| $(5, 6) + (2, 2) \rightleftharpoons (7, 8)$     |          |       |       | (7,8) |        |         |         |         |         |          |
| $(1, 1) + (5, 9) \rightleftharpoons (6, 10)$    |          |       |       |       | (7,12) |         |         |         |         |          |
| $(4, 6) + (3, 4) \rightleftharpoons (7, 10)$    |          |       |       |       |        |         |         |         |         | (18,27)  |
| $(5, 10) + (1, 2) \rightleftharpoons (6, 12)$   |          |       |       |       |        |         |         |         | (14,26) |          |
| $(3, 5) + (4, 6) \rightleftharpoons (7, 11)$    |          |       |       |       |        |         |         | (15,20) |         |          |
| $(7, 7) + (2, 2) \rightleftharpoons (9, 9)$     |          |       |       |       |        | (12,13) |         |         |         |          |
| $(1, 2) + (6, 10) \rightleftharpoons (7, 12)$   |          |       |       |       | (7,12) |         |         |         |         |          |
| $(2, 3) + (6, 8) \rightleftharpoons (8, 11)$    |          |       |       |       |        |         | (13,17) |         |         |          |
| $(7, 7) + (3, 3) \rightleftharpoons (10, 10)$   |          |       |       |       |        | (12,13) |         |         |         |          |
| $(6, 8) + (4, 4) \rightleftharpoons (10, 12)$   |          |       |       |       |        |         | (13,17) |         |         |          |
| $(9, 9) + (2, 3) \rightleftharpoons (11, 12)$   |          |       |       |       |        | (12,13) |         |         |         |          |
| $(6, 12) + (2, 4) \rightleftharpoons (8, 16)$   |          |       |       |       |        |         |         |         | (14,26) |          |
| $(11, 12) + (1, 1) \rightleftharpoons (12, 13)$ |          |       |       |       |        | (12,13) |         |         |         |          |
| $(10, 12) + (2, 3) \rightleftharpoons (12, 15)$ |          |       |       |       |        |         | (13,17) |         |         |          |
| $(7, 11) + (4, 6) \rightleftharpoons (11, 17)$  |          |       |       |       |        |         |         | (15,20) |         |          |
| $(1, 0) + (11, 17) \rightleftharpoons (12, 17)$ |          |       |       |       |        |         |         | (15,20) |         |          |
| $(2, 4) + (8, 16) \rightleftharpoons (10, 20)$  |          |       |       |       |        |         |         |         | (14,26) |          |
| $(12, 15) + (1, 2) \rightleftharpoons (13, 17)$ |          |       |       |       |        |         | (13,17) |         |         |          |
| $(0, 1) + (10, 20) \rightleftharpoons (10, 21)$ |          |       |       |       |        |         |         |         | (14,26) |          |
| $(1, 1) + (12, 17) \rightleftharpoons (13, 18)$ |          |       |       |       |        |         |         | (15,20) |         |          |
| $(10, 21) + (0, 2) \rightleftharpoons (10, 23)$ |          |       |       |       |        |         |         |         | (14,26) |          |

continued on next page ...

TABLE S4b

... continued from previous page

| Reaction                                        | Catalyst |       |       |       |       |       |       |         |         |          |
|-------------------------------------------------|----------|-------|-------|-------|-------|-------|-------|---------|---------|----------|
|                                                 | $G_1$    | $G_2$ | $G_3$ | $G_4$ | $G_5$ | $G_6$ | $G_7$ | $G_8$   | $G_9$   | $G_{10}$ |
| $(13, 18) + (1, 2) \rightleftharpoons (14, 20)$ |          |       |       |       |       |       |       | (15,20) |         |          |
| $(7, 10) + (7, 10) \rightleftharpoons (14, 20)$ |          |       |       |       |       |       |       |         |         | (18,27)  |
| $(0, 2) + (10, 23) \rightleftharpoons (10, 25)$ |          |       |       |       |       |       |       |         | (14,26) |          |
| $(0, 1) + (14, 20) \rightleftharpoons (14, 21)$ |          |       |       |       |       |       |       |         |         | (18,27)  |
| $(1, 0) + (14, 20) \rightleftharpoons (15, 20)$ |          |       |       |       |       |       |       | (15,20) |         |          |
| $(10, 23) + (1, 2) \rightleftharpoons (11, 25)$ |          |       |       |       |       |       |       |         | (14,26) |          |
| $(8, 16) + (5, 10) \rightleftharpoons (13, 26)$ |          |       |       |       |       |       |       |         | (14,26) |          |
| $(14, 21) + (2, 2) \rightleftharpoons (16, 23)$ |          |       |       |       |       |       |       |         |         | (18,27)  |
| $(4, 6) + (10, 20) \rightleftharpoons (14, 26)$ |          |       |       |       |       |       |       |         | (14,26) |          |
| $(2, 3) + (16, 23) \rightleftharpoons (18, 26)$ |          |       |       |       |       |       |       |         |         | (18,27)  |
| $(14, 21) + (4, 6) \rightleftharpoons (18, 27)$ |          |       |       |       |       |       |       |         |         | (18,27)  |
